# Supplementary material for: CCL7 and olfactory transduction pathway activation play an important role in the formation of CaOx and CaP kidney stones
Source: Front Genet. 2024 Jan 3;14:1267545. doi: 10.3389/fgene.2023.1267545 (PMC10791818; doi:10.3389/fgene.2023.1267545)
Supplement: Supplementary file 8 [file DataSheet1.XLSX]

## Sheet: Sheet1
CCL7
	Housekeeping gene					gene of interest					control ΔΔCт	-0.714623
	ct1	ct2	ct3	average ct		ct1	ct2	ct3		ΔΔCт			average ΔΔCт		ΔΔCт		2^-ΔΔCт		log(2^-ΔΔCт)
曾焕勤	27.3013	27.4365	27.4365	27.3914		26.4246	26.3368	26.3229		-0.966837	-1.05465	-1.06857	-1.03002		-0.315394		1.24435
陈兰莺	23.673	23.7045	24.0723	23.8166		23.4145	23.3848	23.412		-0.402037	-0.431784	-0.404622	-0.412814		0.301809		0.811235
金连普	27.9604	28.1534	28.0471	28.0536		27.8268	27.6952	27.7386		-0.226833	-0.358381	-0.315037	-0.300084		0.414539		0.750259
朱合蕊	30.6233	30.9724	30.2728	30.6228		30.0183	30.1605	30.2232		-0.604497	-0.462344	-0.399644	-0.488828		0.225795		0.855124
潜岳恒	24.1783	24.5121	24.5104	24.4003		23.2767	23.2068	23.2196		-1.12361	-1.19351	-1.1807	-1.16594		-0.451314		1.36728
魏巍	23.9165	23.9533	23.9361	23.9353		22.7646	22.6669	22.7801		-1.17069	-1.26837	-1.15517	-1.19808		-0.483455		1.39809
OR10A5-1
	Housekeeping gene					gene of interest					control ΔΔCт	-0.83294
	ct1	ct2	ct3	average ct		ct1	ct2	ct3		ΔΔCт			average ΔΔCт		ΔΔCт		2^-ΔΔCт		log(2^-ΔΔCт)
曾焕勤	26.1611	26.0666	26.0666	26.0981		24.0062	24.1144	23.9493		-2.09188	-1.98363	-2.14881	-2.07477		-1.24183		2.36499
陈兰莺	23.7739	23.9559	23.909	23.8796		22.9268	22.9679	22.8487		-0.952813	-0.911711	-1.03093	-0.965152		-0.132212		1.09597
金连普	27.9689	27.9686	27.9686	27.9687		27.3725	27.3374	27.3876		-0.596198	-0.631291	-0.581134	-0.602874		0.230066		0.852596
朱合蕊	30.8881	30.841	30.678	30.8024		29.5954	29.4633	29.8692		-1.20702	-1.33907	-0.933163	-1.15975		-0.326811		1.25424
潜岳恒	24.6852	24.5871	24.6403	24.6375		22.9312	22.7625	22.7126		-1.70636	-1.87506	-1.92495	-1.83546		-1.00252		2.00349
魏巍	24.3246	24.3092	24.3092	24.3144		22.0823	21.9461	21.9688		-2.23204	-2.3683	-2.34559	-2.31531		-1.48237		2.79407
OR1L3-1
	Housekeeping gene					gene of interest					control ΔΔCт	-0.958676
	ct1	ct2	ct3	average ct		ct1	ct2	ct3		ΔΔCт			average ΔΔCт		ΔΔCт		2^-ΔΔCт		log(2^-ΔΔCт)
曾焕勤	26.1611	26.0666	26.0666	26.0981		24.5754	24.8942	24.0298		-1.52264	-1.20389	-2.0683	-1.59828		-0.639604		1.5579
陈兰莺	23.7739	23.9559	23.909	23.8796		22.9307	22.8997	22.9123		-0.94884	-0.979846	-0.967267	-0.965317		-0.00664118		1.00461
金连普	27.9689	27.9686	27.9686	27.9687		26.9167	27.0737	26.9955		-1.052	-0.895058	-0.973223	-0.973426		-0.01475		1.01028
朱合蕊	30.8881	30.841	30.678	30.8024		29.8125	29.9329	29.8498		-0.989876	-0.869433	-0.952546	-0.937285		0.0213911		0.985282
潜岳恒	24.6852	24.5871	24.6403	24.6375		23.0287	23.0608	23.1728		-1.6088	-1.57676	-1.4647	-1.55009		-0.591411		1.50672
魏巍	24.3246	24.3092	24.3092	24.3144		22.6756	22.56	22.604		-1.63882	-1.75441	-1.71041	-1.70121		-0.742536		1.67311
OR9A2-1
	Housekeeping gene					gene of interest					control ΔΔCт	-0.934079
	ct1	ct2	ct3	average ct		ct1	ct2	ct3		ΔΔCт			average ΔΔCт		ΔΔCт		2^-ΔΔCт		log(2^-ΔΔCт)
曾焕勤	26.1611	26.0666	26.0666	26.0981		24.7966	24.5722	24.5814		-1.30149	-1.5259	-1.51668	-1.44802		-0.513944		1.42795
陈兰莺	23.7739	23.9559	23.909	23.8796		22.6521	22.6508	22.9313		-1.22749	-1.22879	-0.948264	-1.13485		-0.200768		1.14931
金连普	27.9689	27.9686	27.9686	27.9687		26.998	27.1514	27.4246		-0.970748	-0.817321	-0.544169	-0.777412		0.156667		0.897095
朱合蕊	30.8881	30.841	30.678	30.8024		30.2195	29.6995	29.7168		-0.582925	-1.10284	-1.08554	-0.923767		0.0103124		0.992877
潜岳恒	24.6852	24.5871	24.6403	24.6375		22.6462	22.738	22.9237		-1.99133	-1.89959	-1.71382	-1.86824		-0.934165		1.91078
魏巍	24.3246	24.3092	24.3092	24.3144		22.2632	22.3836	22.4983		-2.05118	-1.93082	-1.8161	-1.9327		-0.99862		1.99809
